# Supplementary material for: Reconstructing the Social Image of Older Women and Ageing: The Transformative Power of the Narrative Set in the Local Context
Source: MDPI journal article supplement (doi:10.3390/land11071057), 2022-07-12

## Annex S1 - A Reflective Reading Guide

### SOCIOLOGY

#### Reflections on the reading of the book *Casa Ye-ye* and a letter to the author Anna Soldevila\*

Remember that the task has a second part of feedback with the author. We are expected to have a direct face-to-face session (or a virtual one if it is not possible due to Covid-19 restrictions) with the author of the book. I will have sent you your letters, and with it you will be able to answer your questions, contrast your reflections, and share ideas about the reading.

\*Dr Anna Soldevila has a PhD in Psychopedagogy. She is an expert in educational gerontology and a well-known professor at the Faculty of Education, Psychology and Social Work at the University of Lleida (UdL).

#### ABOUT THE TITLE OF THE BOOK

Before starting with the selection of relevant ideas, please give your opinion on the title of the book *Casa Ye-ye* (*The House Ye-ye*) by answering these questions:

- a) When you first saw the book and its title, what did you think it would be about? Why?
- b) Now that you have finished reading the book and have analysed the title-content relationship, please give your opinion about the title, and think about what other readers might think about it.

#### RELEVANT IDEAS OF EACH CHAPTER

Please write down the most important ideas reflected in each of the chapters of the book (always keeping in mind that your opinion is that of a person analysing society and as a future social worker). Please avoid simplistic generalizations and provide solid arguments in your answers.

#### ON THE INTEREST OF THE TOPICS / PROBLEMS EXPLAINED IN THE BOOK

Although you are very young, you have previous experiences with your grandparents and older acquaintances and older people and, thus, you have your own ideas about what it means to be and grow older. Some of you have explained in the Google Forms questionnaire at the beginning of the school year that you would not like to work with older adults. Others, on the contrary, have said yes. Each of you has explained your own reasons for your preferences. After the reading, could you give your opinion on the vision of older age and older people as depicted in the book *Casa Ye-ye*?

#### ABOUT THE MAIN CHARACTERS IN THE BOOK

The book depicts the lives of different older people that involve agreements, relationships, and conflicts. Each of the characters has diverse experiences and problems related to later life, as explained in the narrative. Which characters are you most interested in? Why? Which ones did surprise you? Why? The answers must be soundly argued and explained.

#### ON REALITY AND FICTION

After reading the book, think about the following questions: Would you say that the book is the result of research carried out by the author? Would you say it is a biographical narrative? Is it a fictional narrative or not? Please provide detailed answers.

#### CONTRIBUTIONS TO YOUR PREVIOUS KNOWLEDGE

Please reflect on what you have learned from this reading. What experiences do you share with the author? What are the aspects that you had not thought about and now you do? What questions did you have before the reading (if any) and which ones were answered after the reading? What knowledge did you bring? Has the book raised any new questions for you? Which ones? Please be specific, your detailed answers are a great contribution to the author and her research.

## READING AND SOCIAL WORKERS

You have already reflected on what this reading has brought to you as a person. Now, please, reflect on the book from the perspective of a social work. Would this book be a must-read for a social work professional? Explain your answers in a detailed way.

## PERSONAL ASSESSMENT

Please provide your personal assessment and opinion about the narrative. Did the reading of the book live up to your expectations?

## LETTER TO THE AUTHOR ANNA SOLDEVILA

Please write a letter to the author of the book (I recommend that you first prepare the previous tasks before writing the letter), in which you expose your viewpoints and personal reflections. You can also ask her questions, share or contrast opinions expressed in the book, ask her for clarification, etc. The letter should follow the formal letter structure. Remember that it is a real letter addressed to a real recipient.

Good luck! I hope you enjoy reading the book, reflecting on it, and writing the letter to the author.

## Annex S2 - Analysis Scheme

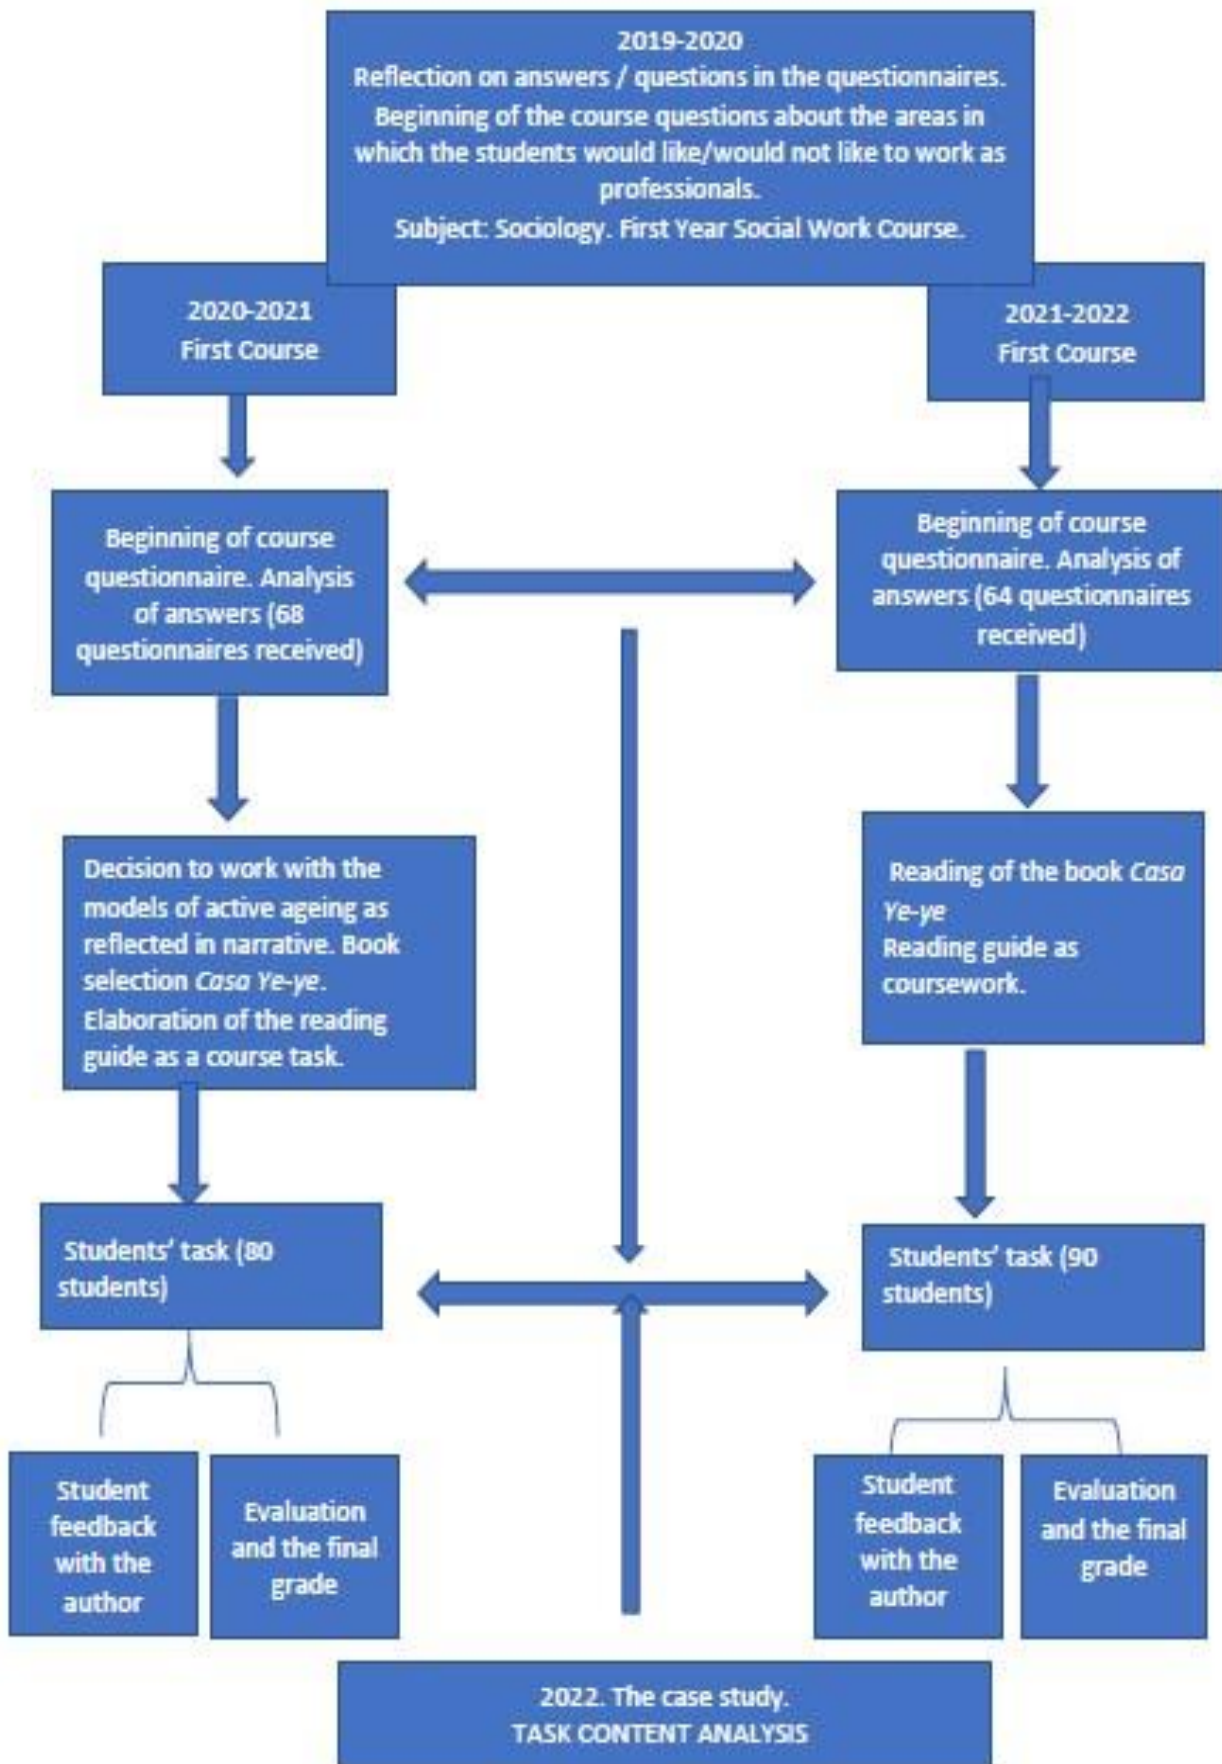

Supplement: s1 [file s1]
